# Supplementary material for: Tumour-stroma ratio and 5-year mortality in gastric adenocarcinoma: a systematic review and meta-analysis
Source: PubMed Central journal article supplement (PMC6831590; doi:10.1038/s41598-019-52606-7), 2019-11-05

# Tumor-stroma ratio and 5-year mortality in gastric adenocarcinoma: a systematic review and meta-analysis

Niko Kemi, Maarit Eskuri, Joonas H Kauppila

Supplementary figures

**Supplementary figure 1.** Funnel plot for assessment of publication bias

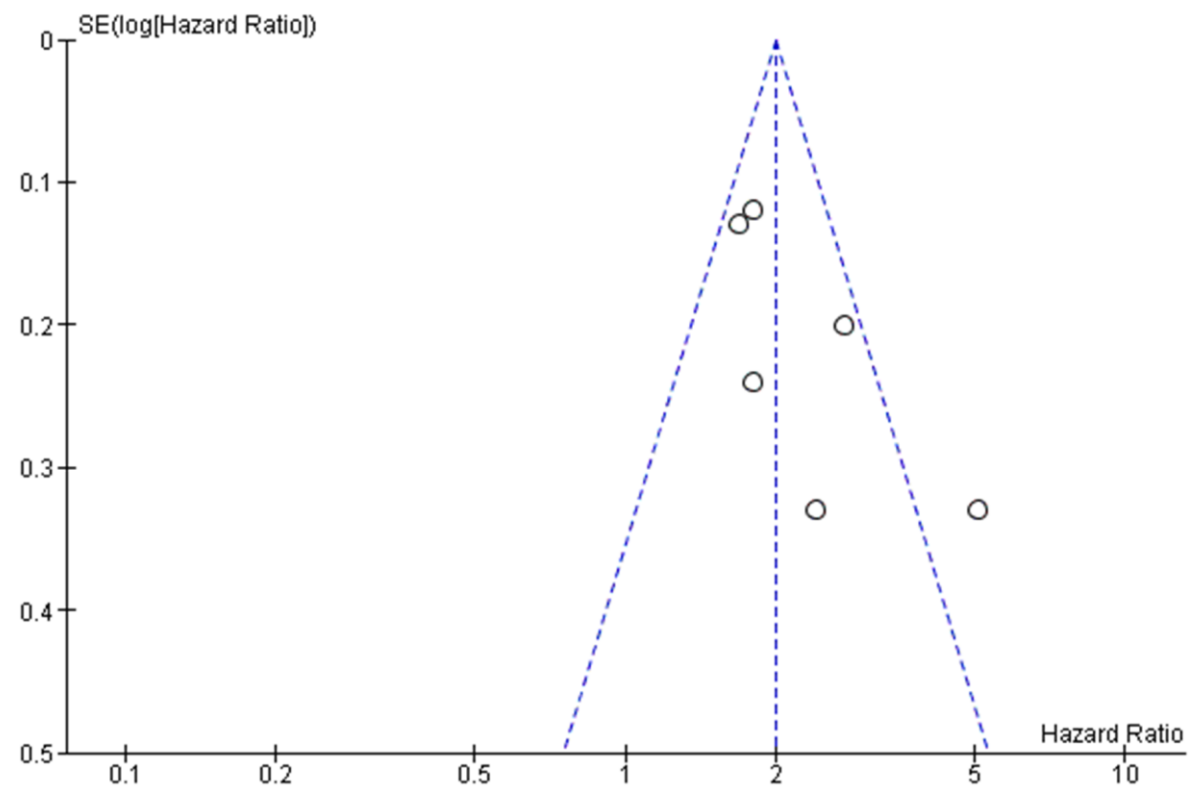

**Supplementary figure 2.** Forest plot comparing five-year survival in low and high TSR groups

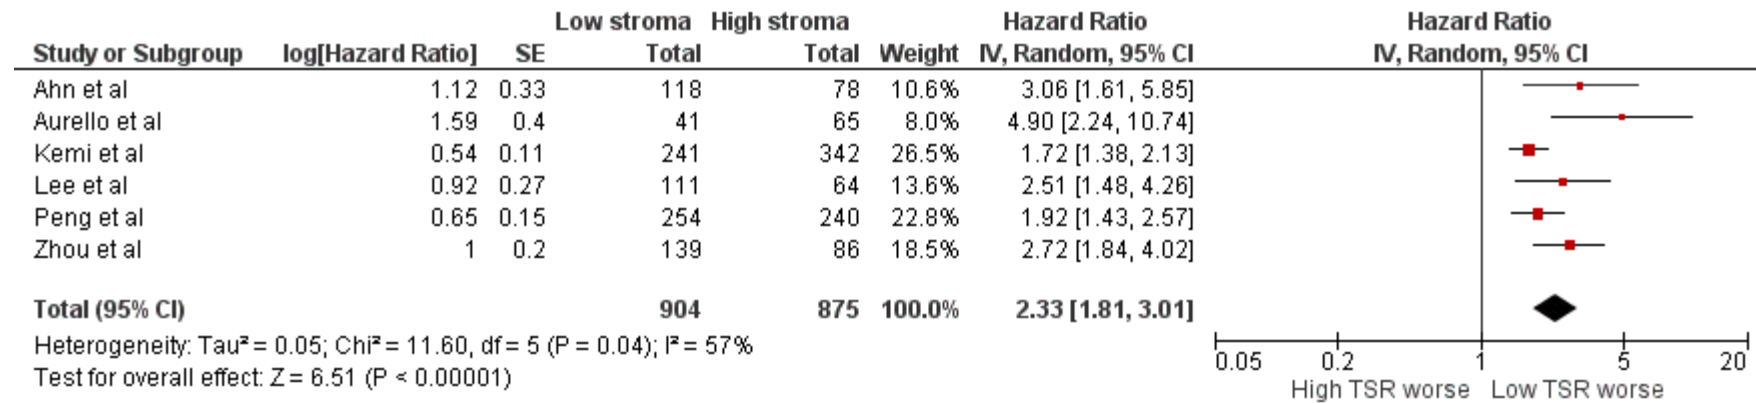

Supplement: 41598_2019_52606_MOESM1_ESM.pdf [file 41598_2019_52606_MOESM1_ESM.pdf]
